# Supplementary material for: Clinical operations of academic versus non-academic emergency departments: a descriptive comparison of two large emergency department operations surveys
Source: BMC Emerg Med. 2019 Nov 21;19:72. doi: 10.1186/s12873-019-0285-7 (PMC6868754; doi:10.1186/s12873-019-0285-7)
Supplement: Supplementary file 2 — Additional file 2: Table S2. EDBA Benchmarking Survey, Select Questions and Definitions. List of EDBA survey questions and associated definitions [file 12873_2019_285_MOESM2_ESM.pdf]

Supplement Table 2. EDBA Benchmarking Survey, Select Questions and Definitions

*Italics denotes calculated fields for comparison to AAAEM/AACEM values.*

| Question                                                                | Definition                                                                                                                                                         |
|-------------------------------------------------------------------------|--------------------------------------------------------------------------------------------------------------------------------------------------------------------|
| Is this a Trauma Center Level I, II, III, or IV or no designation?      |                                                                                                                                                                    |
| Do you participate in training Emergency Medicine residents?            |                                                                                                                                                                    |
| What were the total ED Visits for 2017?                                 |                                                                                                                                                                    |
| What % of ED patients were admitted?                                    | Includes BOTH full and observation admissions                                                                                                                      |
| What % of TOTAL hospital admissions come through the ED?                | Includes full and observation admissions                                                                                                                           |
| % of patients under age 2?                                              |                                                                                                                                                                    |
| % of patients between 2 and 18 years of age?                            |                                                                                                                                                                    |
| <i>% Pediatric Visits</i>                                               | % of patients under age 2 + % of patients between 2 and 18 years of age                                                                                            |
| What % of patients arrived by EMS?                                      |                                                                                                                                                                    |
| Of patients arriving by EMS, what % admitted?                           |                                                                                                                                                                    |
| What % patients Left Before Treatment was Complete (LBTC)?              | Includes all patients who left before or after triage, eloped, left AMA, or any other descriptor used to identify patients who leave before treatment is complete. |
| How many patient care spaces in the ED (or ED beds)?                    |                                                                                                                                                                    |
| <i>Visits Per Treatment Space</i>                                       | <i>Total ED Visits / Patient Care Spaces</i>                                                                                                                       |
| What is gross square footage of ED?                                     |                                                                                                                                                                    |
| MEDIAN Length of Stay for ALL patients?                                 |                                                                                                                                                                    |
| MEDIAN Total Length of Stay for Admitted Patients?                      |                                                                                                                                                                    |
| MEDIAN Length of Stay for Treat and Release Patients?                   |                                                                                                                                                                    |
| MEDIAN time for patients from Door to “Bed”?                            |                                                                                                                                                                    |
| MEDIAN time for patients from “Bed” to “Doctor Sees Patient”?           |                                                                                                                                                                    |
| MEDIAN Admit decision to departure time (CMS Measure)?                  |                                                                                                                                                                    |
| What % High Acuity                                                      | Physician CPT code level 4 + 5 + critical care                                                                                                                     |
| Studies Used in ED: CT Scans                                            | Number of these procedures performed per hundred patients seen                                                                                                     |
| Studies Used in ED: MRI Images                                          | Number of these procedures performed per hundred patients seen                                                                                                     |
| Studies Used in ED: Ultrasounds                                         | Number of these procedures performed per hundred patients seen                                                                                                     |
| Studies Used in ED: Simple Xrays                                        | Number of these procedures performed per hundred patients seen                                                                                                     |
| The Number of Clinical Staff Hours in an Average Clinical Day: MD       |                                                                                                                                                                    |
| The Number of Clinical Staff Hours in an Average Clinical Day: APP      |                                                                                                                                                                    |
| The Number of Clinical Staff Hours in an Average Clinical Day: Resident |                                                                                                                                                                    |
| <i>Total Daily Provider Hours</i>                                       | <i>Total MD Staffed Clinical Hours + Total APP Staffed Clinical Hours + Total Resident Staffed</i>                                                                 |

|                                                                        |                                                                                                         |
|------------------------------------------------------------------------|---------------------------------------------------------------------------------------------------------|
|                                                                        | <i>Clinical Hours</i>                                                                                   |
| <i>Patients Per Attending Hour</i>                                     | <i>(Total ED Visits / 365) / Total MD Staffed Clinical Hours</i>                                        |
| <i>Physician + APP Ratio</i>                                           | <i>(Total ED Visits / 365) / (Total MD Staffed Clinical Hours + Total APP Staffed Clinical Hours/2)</i> |
| The Number of Clinical Staff Hours in an Average Clinical Day: Scribes |                                                                                                         |
